# Supplementary material for: Phase control of cubic SBA-1 mesostructures via alcohol-assisted synthesis
Source: Royal Society of Chemistry journal article supplement (doi:10.1039/b504320d), 2005-01-01

**Figure S1.** Powder XRD patterns of as-synthesized samples, synthesized in the absence of alcohols at different temperatures: (a) 273 K, (b) 293 K, (c) 323 K, (d) 343 K and (e) 363 K.

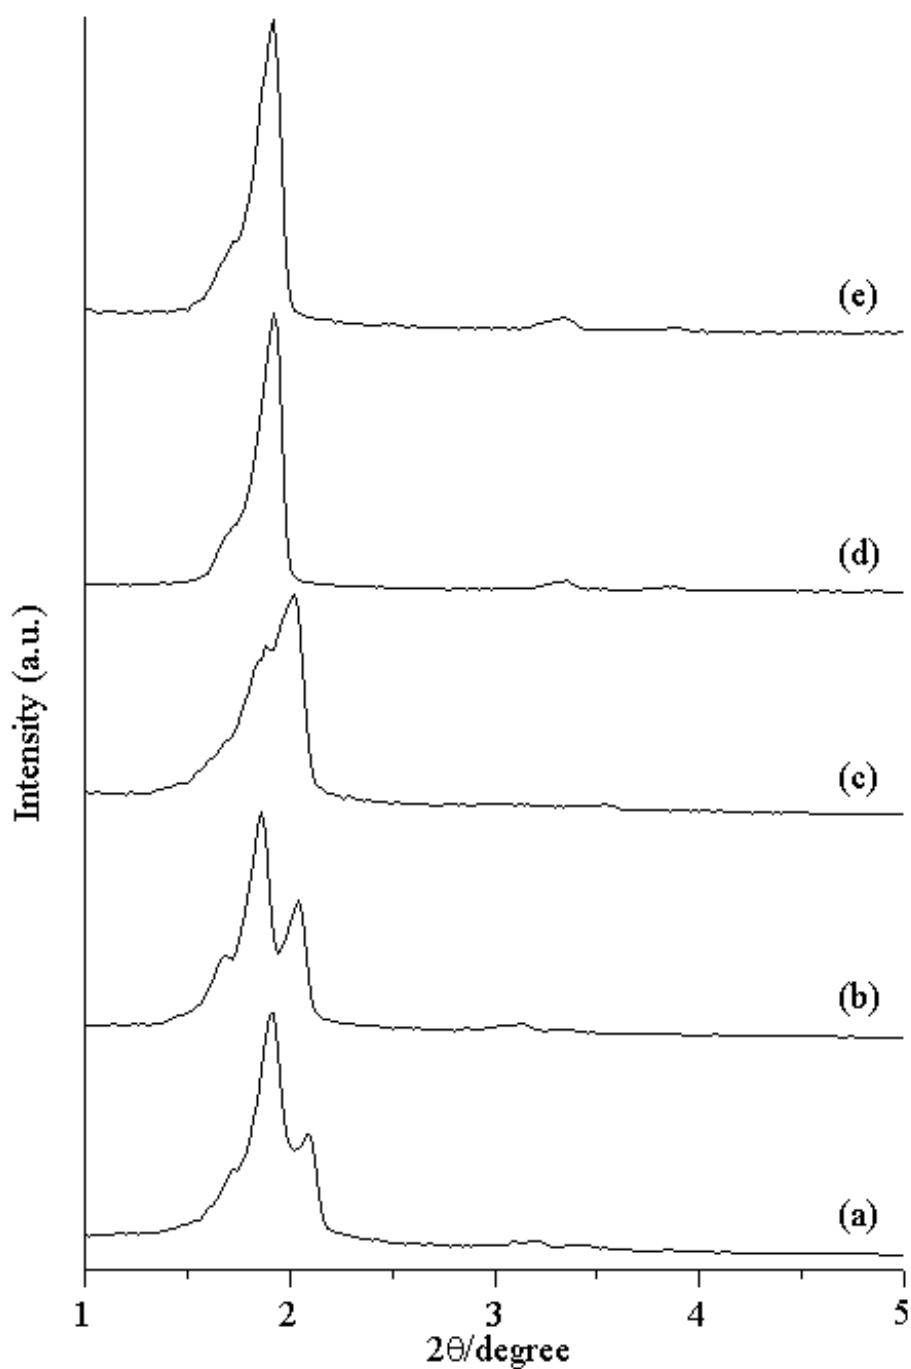

**Figure S2.** Powder XRD patterns of as-synthesized samples, synthesized at 323 K as a function of methanol/CTEABr ratio: (a) 1, (b) 10, (c) 20, (d) 50 and (e) 190.

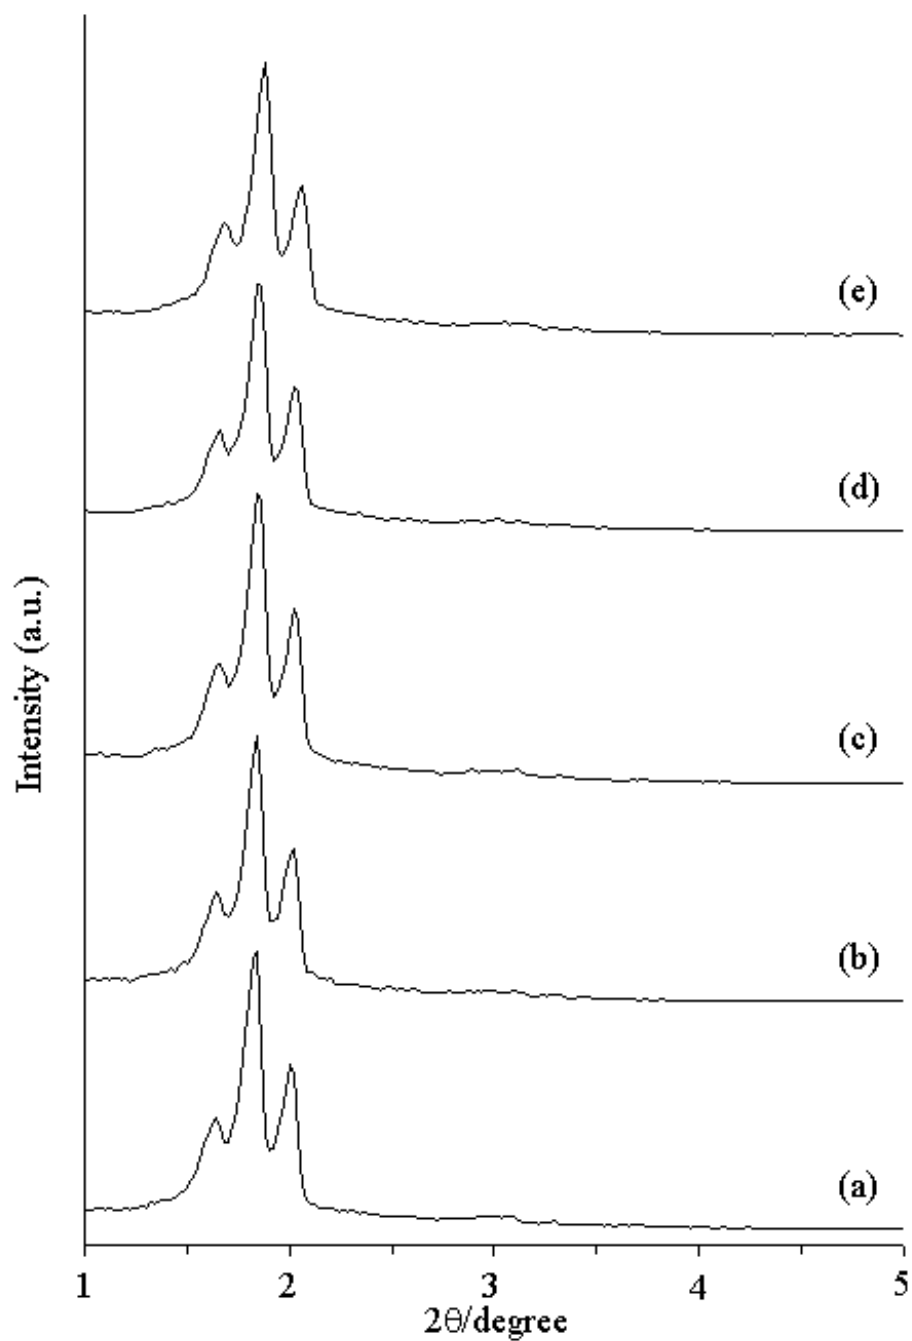

Supplement: b504320d.pdf [file b504320d.pdf]
